# Supplementary material
Source: publisher figshare collection journal article supplement (https://tandf.figshare.com/articles/dataset/_/12430331)
Supplement: Supplementary file 1 [file 1]

# Appendix

## Slice volume derivation

We calculate the relative volume of a slice through a  $p$  dimensional hypersphere of radius  $R$ . In general the volume of a full hypersphere with radius  $r$  in  $q$  dimensions is given as

$$V(r, q) = \frac{\pi^{q/2} r^q}{\frac{q}{2} \Gamma(q/2)}, \quad (1)$$

and its variation with the radius is

$$\frac{dV(r, q)}{dr} = 2 \frac{\pi^{q/2} r^{q-1}}{\Gamma(q/2)}. \quad (2)$$

To calculate the slice volume we note that it is spherical in the  $p - 2$  dimensional orthogonal space on the projection plane, while capturing the full volume (i.e. area) inside the plane. To calculate the slice volume we therefore integrate the product of  $\frac{dV(r, p-2)}{dr}$  and the area in the plane parametrised by  $r$ , from the origin to the full slice thickness  $h$ . The area in the plane is a circle with radius  $\sqrt{R^2 - r^2}$ . The slice volume is thus calculated as

$$V_{slice}(R, h, p) = \int_0^h \frac{dV(r, p-2)}{dr} V(\sqrt{R^2 - r^2}, 2) dr = \frac{\pi^{p/2}}{\Gamma(p/2)} \frac{h^{p-2}}{p} [pR^2 - (p-2)h^2]. \quad (3)$$

The relative volume of the slice is then simply given as

$$V_{rel}(R, h, p) = \frac{V_{slice}(R, h, p)}{V(R, p)} = \frac{h^{p-2}}{2R^p} [pR^2 - (p-2)h^2]. \quad (4)$$
